# Supplementary material for: 3-Dimensional porous N-doped graphene foam as a non-precious catalyst for the oxygen reduction reaction
Source: Royal Society of Chemistry journal article supplement (doi:10.1039/c4ta06538g), 2015-01-01
Supplement: c4ta06538g1.pdf [file c4ta06538g1.pdf]

## Supporting information

### 3-Dimensional Porous N-doped Graphene Foam as Non-Precious Catalysts for Oxygen Reduction Reaction

5

Xuejun Zhou<sup>a</sup>, Zhengyu Bai<sup>b</sup>, Mingjie Wu<sup>a</sup>, Jinli Qiao<sup>a,b\*</sup>, Zhongwei Chen<sup>c\*</sup>

*<sup>a</sup>College of Environmental Science and Engineering, Donghua University, 2999 Ren'min North  
10 Road, Shanghai 201620, P. R. China*

*<sup>b</sup>School of Chemistry and Chemical Engineering, Henan Normal University; Key Laboratory of Green  
Chemical Media and Reactions, Ministry of Education, Xixiang 453007, P. R. China*

*<sup>c</sup>Department of Chemical Engineering, E6-2006, University of Waterloo, 200 University Avenue West,  
Waterloo, ON, N2L 3G1, Canada*

15

The peroxide percentage ( $H_2O_2\%$ ) was determined from RRDE measurements based on the disk current ( $I_d$ ) and ring current ( $I_r$ ) via the following equation:

$$H_2O_2\% = 100 \times \frac{2I_r / N}{I_d + I_r / N}$$

The electron transfer number ( $n$ ) was based on the following equation:

$$5n = \frac{4I_d}{I_d + I_r / N}$$

where  $N = 0.36$  is the current collection efficiency of Pt ring, which is calibrated in 0.1M KOH with a 10 mM  $K_3Fe(CN)_6$  electrolyte.

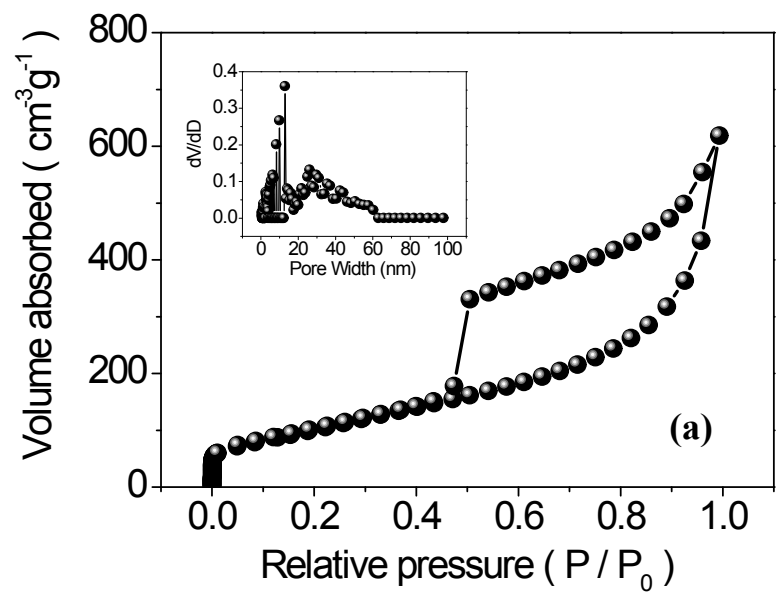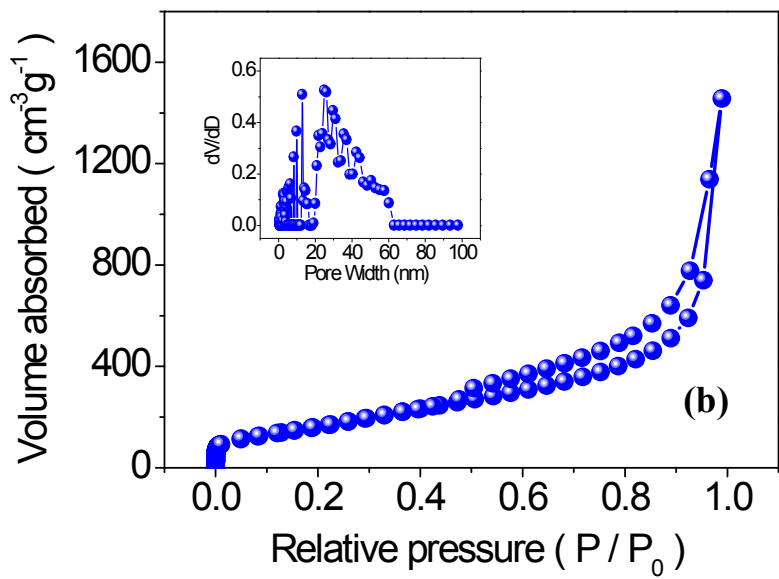

**Figure S1.**  $\text{N}_2$  adsorption/desorption isotherms of (a) NG, (b) PNG. The insert is the pore size distribution.

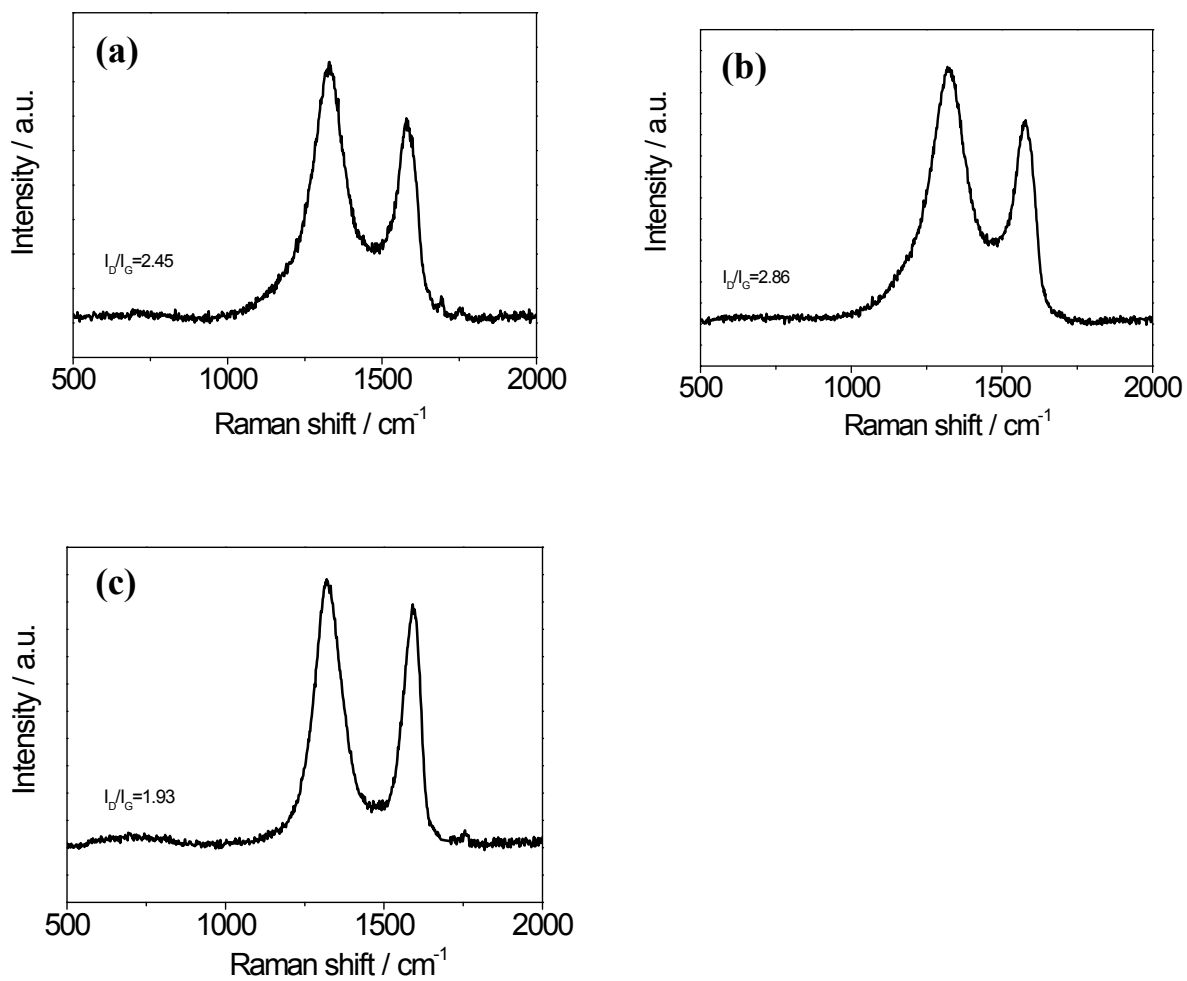

**Figure S2.** Raman spectra of (a) NG, (b) PNG, (c) GO.

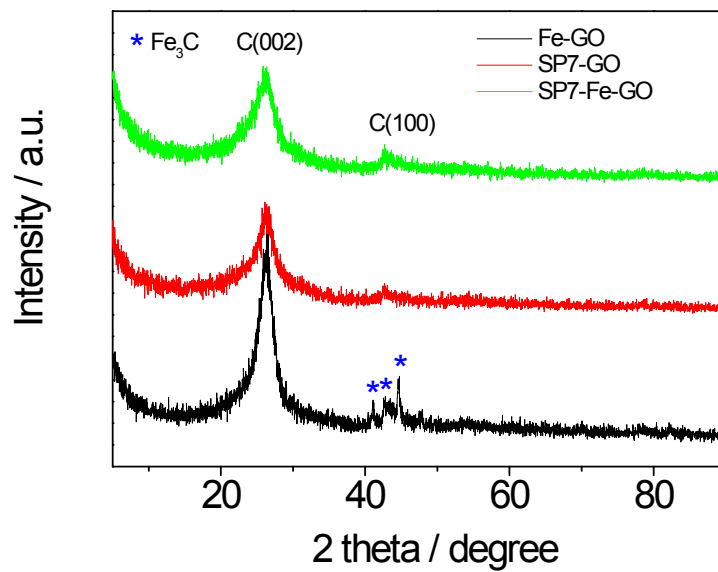

**Figure S3.** X-ray diffraction (XRD) of NG, PNG and PNGF, respectively.

Figure S3 shows the XRD patterns of different samples. Two broad signals of centred at  $26.3^\circ$  and  $42.6^\circ$  can be assigned to the diffraction peak of graphitic carbon. Due to the low content of iron and large noise of XRD signals, it is hard to distinguish the phase of Fe element in the PNGF. Interestingly, The XRD spectra confirm the presence of a  $\text{Fe}_3\text{C}$  phase in the NG.

10

15

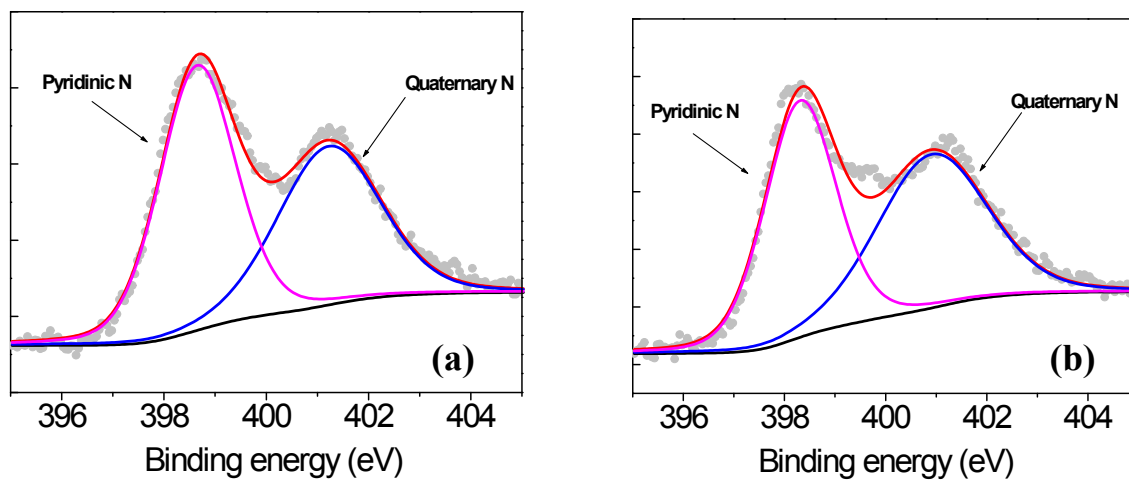

**Figure S4.** High resolution N1s XPS spectra of (a) NG, (b) PNG.

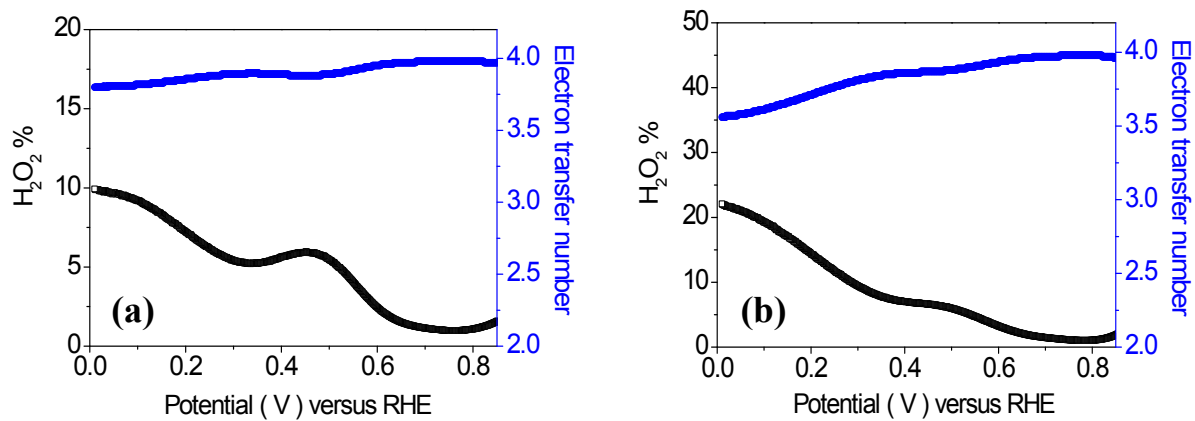

**Figure S5.** The percentage of H<sub>2</sub>O<sub>2</sub> produced and electron transfer number of (a) NG, (b) PNG in O<sub>2</sub>-saturated 0.1 M KOH (1600 rpm).

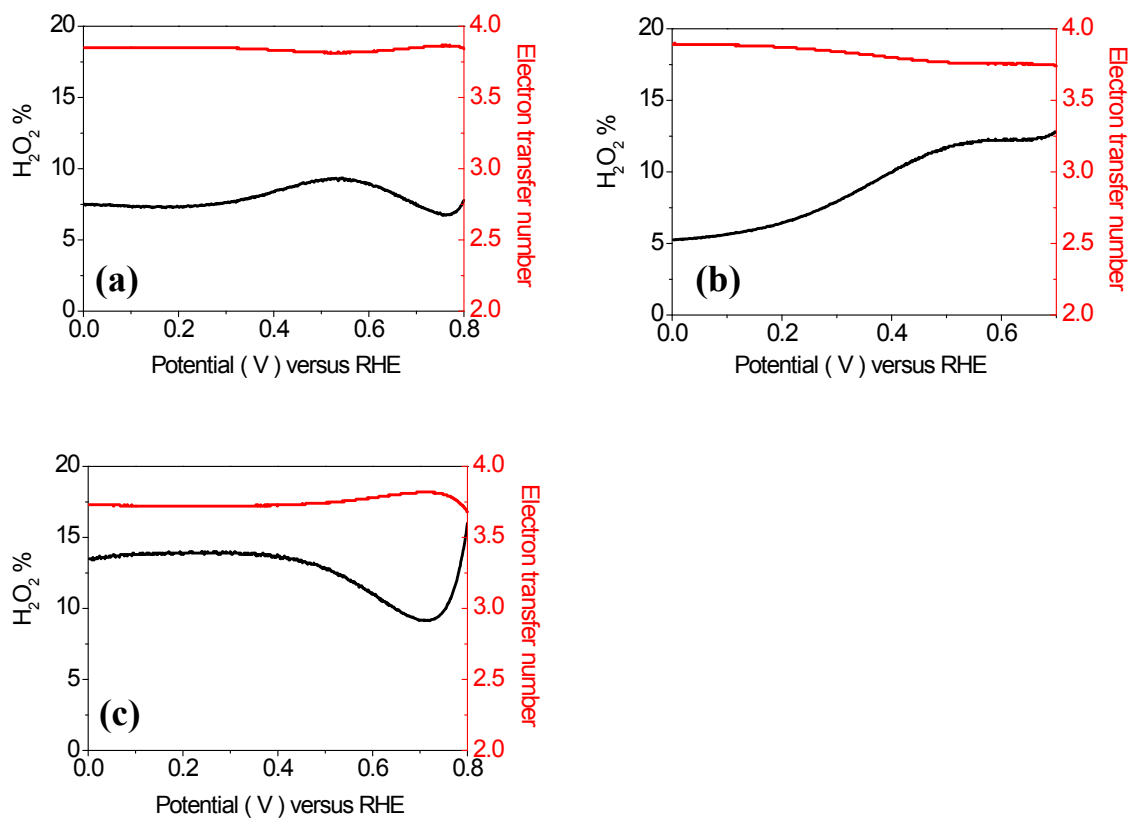

**Figure S6.** The percentage of H<sub>2</sub>O<sub>2</sub> produced and electron transfer number of (a) PNGF, (b) PNG, (c) NG in O<sub>2</sub>-saturated 0.1 M HClO<sub>4</sub> (1600 rpm).



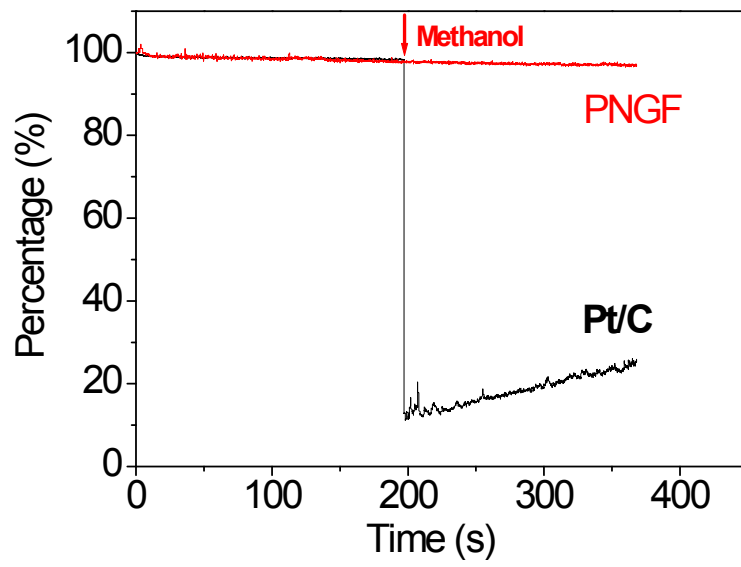

**Figure S7.** Chronoamperometric responses of PNGF and Pt/C at 0.6 V in O<sub>2</sub>-saturated 0.1 M HClO<sub>4</sub> followed by addition of 3M methanol.

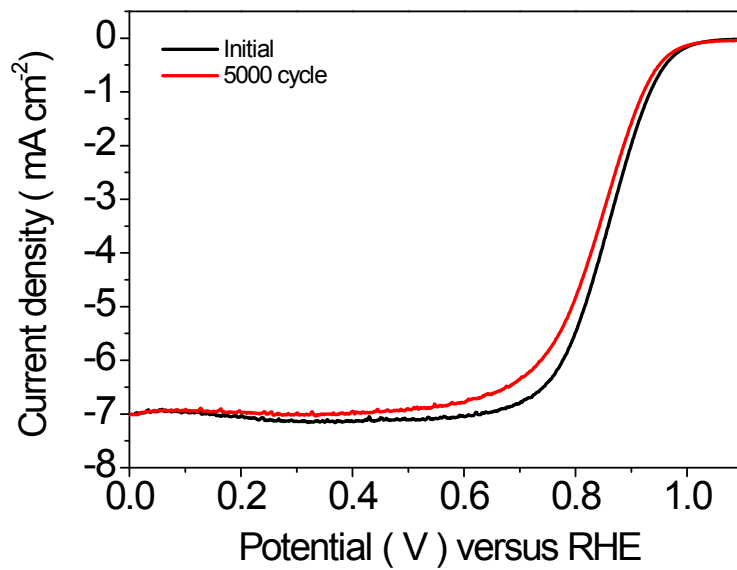

**Figure S8.** Linear sweep voltammograms of PNGF on a rotating disk electrode (1600 rpm) before and after 5000 cycles in O<sub>2</sub>-saturated 0.1M KOH at a scan rate of 5 mV s<sup>-1</sup>.

**Table S1.** Atomic content of all the catalysts calculated from the XPS survey spectra.

| Catalyst | C content<br>(at.%) | O content<br>(at.%) | N content<br>(at.%) | Pyridinic N | Graphitic<br>N | Ratio<br>(Graphitic/PyridinicN) |
|----------|---------------------|---------------------|---------------------|-------------|----------------|---------------------------------|
| PNGF     | 92.0                | 2.93                | 5.07                | 55.9%       | 44.1%          | 0.79                            |
| PNG      | 90.92               | 2.45                | 6.64                | 50.2%       | 49.8%          | 0.99                            |
| NG       | 91.71               | 2.82                | 5.47                | 55.2%       | 44.8%          | 0.81                            |
